# Supplementary material for: Bridging chemical- and bio-catalysis: high-value liquid transportation fuel production from renewable agricultural residues
Source: Royal Society of Chemistry journal article supplement (doi:10.1039/c6gc02546c), 2016-11-21
Supplement: c6gc02546c1.pdf [file c6gc02546c1.pdf]

## SUPPLEMENTARY INFORMATION

### **Bridging the chemical- and bio-catalysis: high-valued liquid transportation fuels production from renewable agricultural residues**

**Chuang Xue, Min Liu, Xinwen Guo, Elton P. Hudson, Lijie Chen, Fengwu Bai, Fangfang Liu, Shang-Tian Yang**

#### **1, Supplementary Methods:**

##### **Strain culture and ABE fermentation using glucose**

*Clostridium acetobutylicum* JB200, a mutant strain of *Clostridium acetobutylicum* ATCC55025 obtained by adaption in a fibrous bed bioreactor, was for ABE fermentation using glucose (Xue et al, 2016). The seed culture for fermentation was prepared in Clostridial growth medium (CGM) containing 30 g/L glucose, 2 g/L yeast extract, 1 g/L Tryptone, minerals and vitamins in a phosphate buffer as described by Xue et al. (2016), and incubated at 37 °C for ~16 h until active growth was well grown. ABE fermentation using glucose as carbon source was conducted using the P2 medium containing glucose (80 g/L), prepared according to the procedures described previously (Xue et al, 2016). The medium was sterilized at 121 °C for 30 minutes. All solutions were purged with nitrogen for 1 h through a sterile 0.2 mm filter, either before or after autoclaving.

Fed-batch fermentations with glucose for *Clostridium acetobutylicum* JB200 was studied at 37 °C and pH 5.0, respectively, with intermittent gas stripping to periodically remove butanol from the fermentation broth to alleviate butanol toxicity. When residual glucose decreased to ~1 g/L, the concentrated glucose was pumped into the stirred bioreactor to supplement carbon source for ABE fermentation.

## 2, Supplementary Figures:

**Supplementary Figure 1**-The yields of the products by alkylation under continuous mode. Yield based on the acetone in feed. The flow rate of product mixture in feed was controlled at 1.0 ml/h. The product mixture containing ABE solvents derived from glucose;

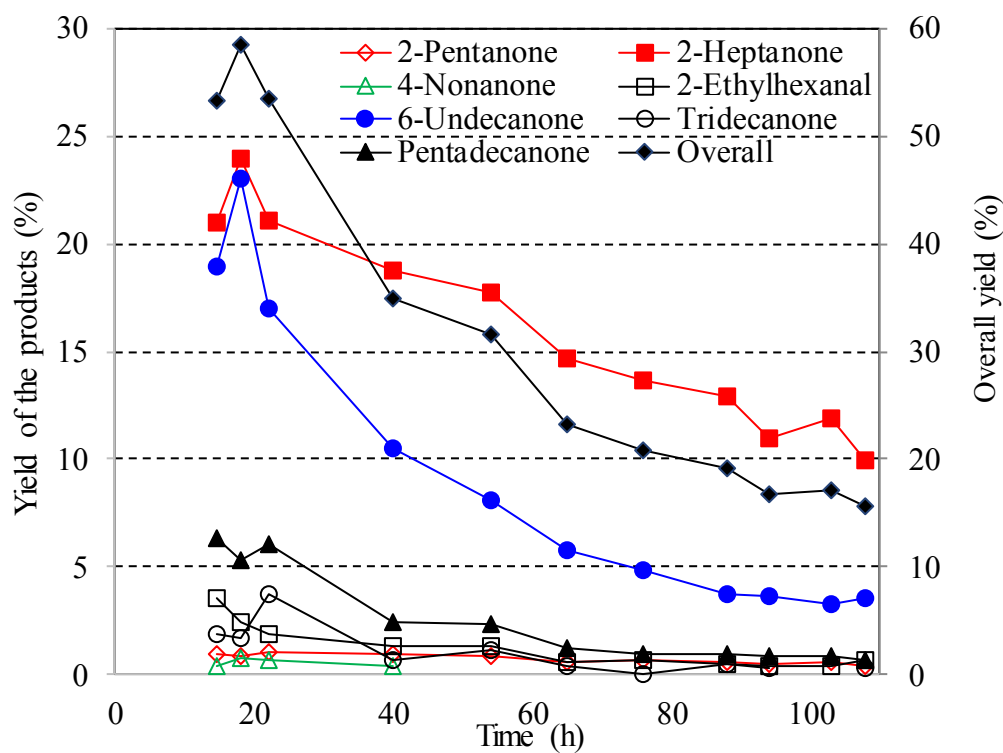

### 3, Supplementary Tables:

#### Supplementary Table 1- ABE fermentation without/with *in situ* product recovery

using glucose

| Fermentation parameters     | Batch fermentation | Fed-batch fermentation with <i>in situ</i> product recovery |
|-----------------------------|--------------------|-------------------------------------------------------------|
| Acetone, g/L                | 9.6                | 32.9                                                        |
| Butanol, g/L                | 19.1               | 74.9                                                        |
| Ethanol, g/L                | 2.6                | 5.5                                                         |
| Acetic acid, g/L            | 1.3                | 0.4                                                         |
| Butyric acid, g/L           | 1.9                | 1.0                                                         |
| Total ABE, g/L              | 31.3               | 113.3                                                       |
| glucose utilized, g/L       | 86.4               | 315.8                                                       |
| Fermentation time, h        | 78                 | 209                                                         |
| Butanol productivity, g/L/h | 0.24               | 0.36                                                        |
| ABE productivity, g/L/h     | 0.40               | 0.54                                                        |
| Butanol yield, g/g          | 0.22               | 0.24                                                        |
| ABE yield, g/g              | 0.36               | 0.36                                                        |

**Supplementary Table 2**-Products obtained from the gas stripping and pervaporation using glucose for ABE fermentation.

|                                 | Gas stripping | Pervaporation | Product mixture for alkylation |
|---------------------------------|---------------|---------------|--------------------------------|
| Acetone, g/L                    | 36.9          | 161.7         | 101.0                          |
| Butanol, g/L                    | 150.5         | 446.7         | 525.5                          |
| Ethanol, g/L                    | 8.6           | 10.9          | 10.3                           |
| ABE, g/L                        | 196.0         | 619.3         | 636.8                          |
| ABE flux, g/m <sup>2</sup> ·h   | N/A           | 274.9         | N/A                            |
| Total flux, g/m <sup>2</sup> ·h | N/A           | 444.0         | N/A                            |
| SF of butanol                   | 15.9          | 33.0          | N/A                            |
| SF of ABE                       | 15.0          | 40.0          | N/A                            |

#### 4, Supplementary References

1. C. Xue, F.F. Liu, M.M. Xu, J.B. Zhao, L.J. Chen, J.G. Ren, F.W. Bai and S.T. Yang, *Biotechnol. Bioeng.* 2016, **113**, 120–129.
